# Supplementary material for: Comprehensive analysis of PD-L1 expression in glioblastoma multiforme
Source: PubMed Central journal article supplement (PMC5522061; doi:10.18632/oncotarget.15031), 2017-02-02
Supplement: oncotarget-08-42214-s001.pdf [file oncotarget-08-42214-s001.pdf]

# Comprehensive analysis of PD-L1 expression in glioblastoma multiforme

## SUPPLEMENTARY MATERIALS

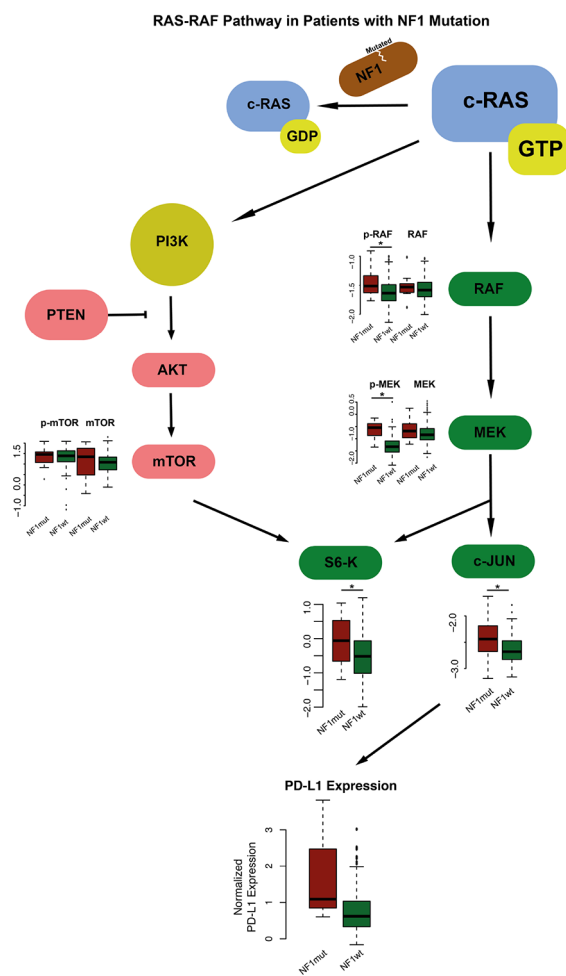

Supplementary Figure 1: Map of the MAPK-pathway in NF1-mutated patients.

### Cluster of TCGA Database and Freiburg Cohort

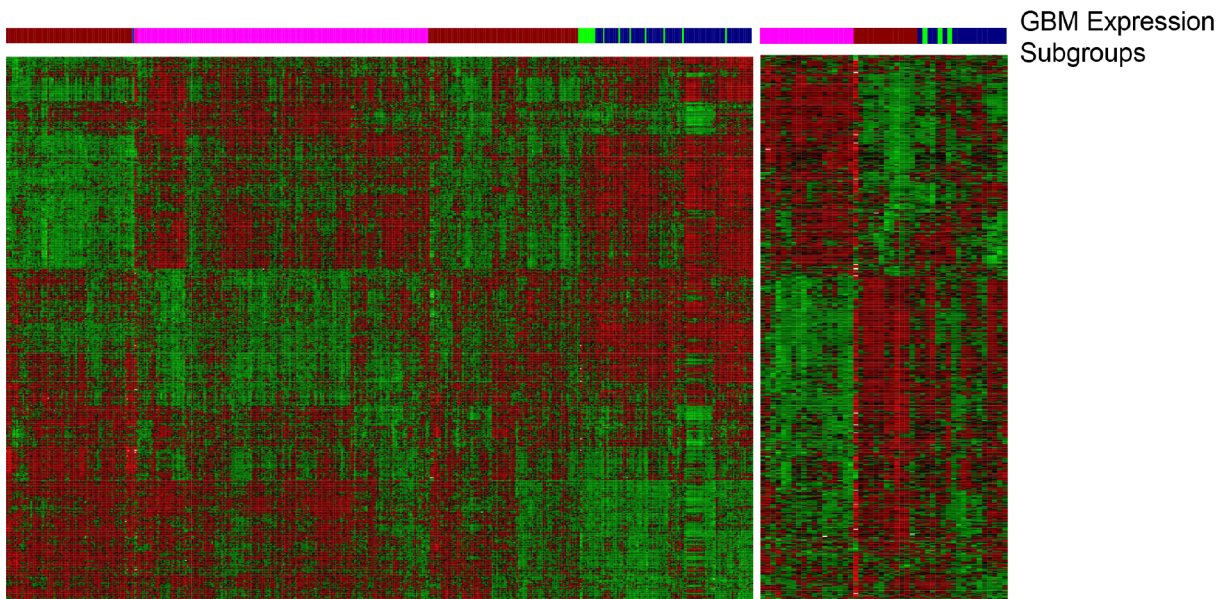

### MDS plot of Random Forest Analysis

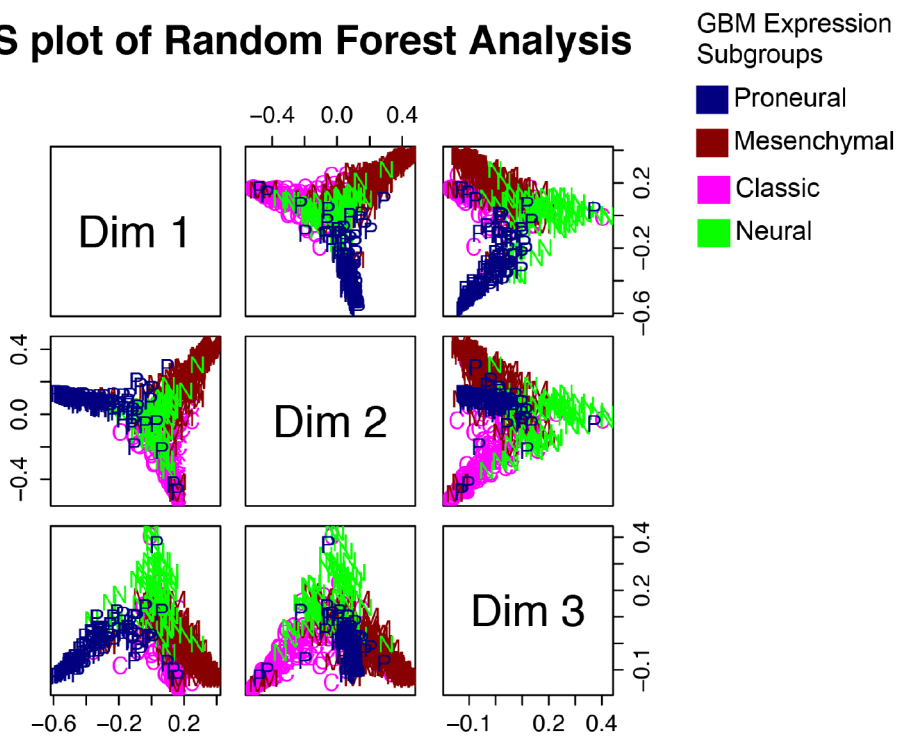

Supplementary Figure 2: Classification of freiburg cohort.

**Supplementary Table 1: Clinical characteristics of Freiburg cohort**

See Supplementary File 1
